# Supplementary material for: Irradiation intensity dependent heterogeneous formation of sulfate and dissolution of ZnO nanoparticles
Source: Royal Society of Chemistry journal article supplement (doi:10.1039/c9en01148j), 2019-12-19

# **Irradiation intensity dependent heterogeneous formation of sulfate and dissolution of ZnO nanoparticles**

Tao Wang<sup>1</sup>, Yangyang Liu<sup>1</sup>, Yue Deng<sup>1</sup>, Hanyun Cheng<sup>1</sup>, Yang Yang<sup>1</sup>, Kejian Li<sup>1</sup>, Xiaozhong  
Fang<sup>1</sup>, Liwu Zhang<sup>1,2\*</sup>

<sup>1</sup> Shanghai Key Laboratory of Atmospheric Particle Pollution and Prevention, Department of  
Environmental Science & Engineering, Fudan University, Shanghai, 200433, Peoples' Republic of  
China

<sup>2</sup> Shanghai Institute of Pollution Control and Ecological Security, Shanghai, 200092, Peoples'  
Republic of China

Number of Pages: 8

Number of Figures: 7

Number of Tables: 2

Number of Reactions: 24

## **Catalogue**

|                                                                           |   |
|---------------------------------------------------------------------------|---|
| <b>Section S1. Experimental</b> .....                                     | 1 |
| <b>Section S2. Kinetics evaluation</b> .....                              | 4 |
| <b>Section S3. XPS evidence</b> .....                                     | 7 |
| <b>Section S4. Detailed reactions in the photocatalytic process</b> ..... | 8 |

## Section S1. Experimental

In-situ diffuse reflectance infrared Fourier transform spectroscopy (DRIFTS) is helpful in discussing the species formed on particles. The schematic diagram of the in-situ setup is present in **Figure S1**. ZnO particles were placed in a ceramic sample cup (0.35 mm depth, 5 mm i.d.). Mass flow controllers (Beijing Sevenstar electronics Co., LTD) were used to adjust the fluxes of reactant gases to the desired flow rate, concentration and relative humidity (RH). A temperature controller was connected to the DRIFTS chamber (Praying Mantis Kit, Harrick) to control the reaction temperature (298 K).

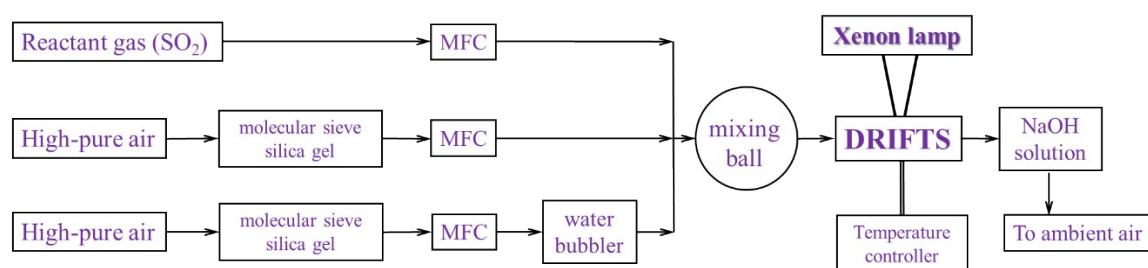

**Figure S1.** Schematic diagram of experimental setup. The DRIFTS chamber is linked with other parts through Teflon tube. MFC: mass flow controller

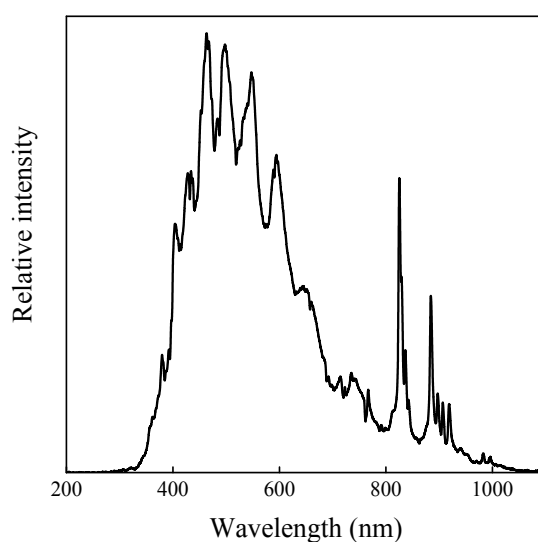

**Figure S2.** Spectral distribution of the Xenon lamp light measured by a fiber optic spectrometer

(AULTT-P4000, Beijing Ceaulight Co., LTD, China).

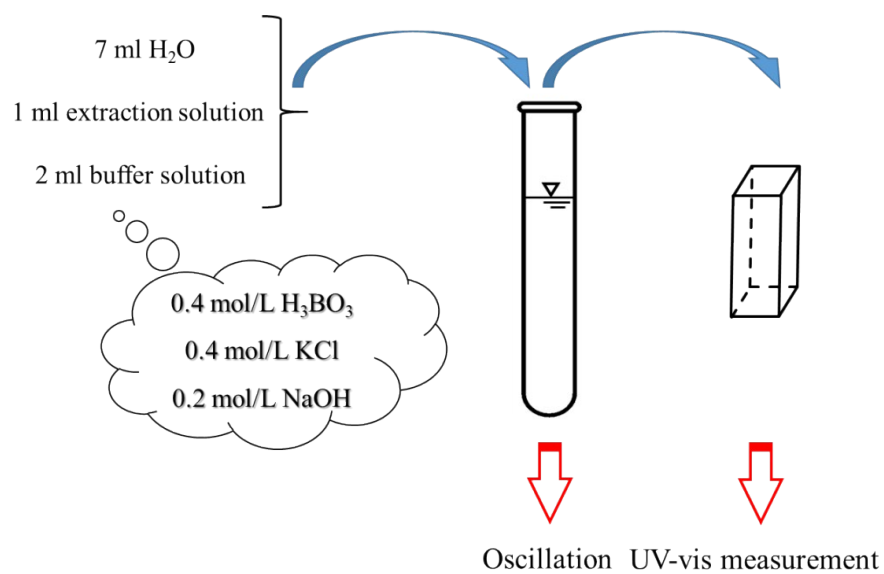

**Figure S3.** Process of the Zn<sup>2+</sup> analysis by means of UV-vis.

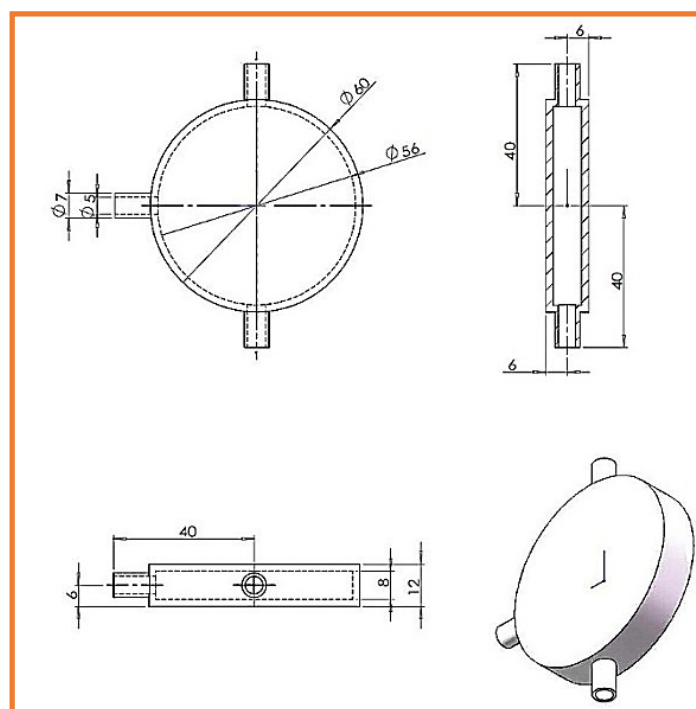

**Figure S4.** Reactor for the ex-situ experiments.

## Section S2. Kinetics evaluation

In the estimation of the uptake coefficients, both BET surface area ( $A_{\text{BET}}$ ) and geometric surface area ( $A_{\text{geo}}$ ) are adopted as the reactive surface area ( $A_s$ ). If the reaction probability is high, the reactants would have no time to diffuse into the sample and the  $A_s$  thus be the geometric surface area of the sample cup ( $A_{\text{geo}}$ ). On the contrary,  $A_{\text{BET}}$ , calculated based on  $S_{\text{BET}}$  and particle mass ( $A_{\text{BET}} = S_{\text{BET}} \times \text{mass}$ ), would more appropriately represent  $A_s$  when the reaction probability is low and the reactants may have enough time to diffuse into the entire sample. Hence,  $\gamma$ -values estimated via  $A_{\text{BET}}$  and  $A_{\text{geo}}$  (denoted as  $\gamma_{\text{BET}}$  and  $\gamma_{\text{geo}}$ , respectively) are mentioned simultaneously to represent the lower and upper limits of  $\gamma$ -values varying with reaction probabilities between the reactants and particles.

**Table S1.** Parameters for uptake coefficient estimations.

| Parameter (unit)                                                        |                                                           | Value                                      |
|-------------------------------------------------------------------------|-----------------------------------------------------------|--------------------------------------------|
| Sulfate formation rate: $d[\text{SO}_4^{2-}]/dt$ (ion·s <sup>-1</sup> ) |                                                           | According to reactions                     |
| Particle reactive surface area: $A_s$ (m <sup>2</sup> )                 | $A_{\text{BET}}$ (m <sup>2</sup> )                        | $S_{\text{BET}} \times \text{sample mass}$ |
|                                                                         | $A_{\text{geo}}$ (m <sup>2</sup> )                        | $1.86 \times 10^{-5}$                      |
| Reactant concentration: $[\text{SO}_2]$ (molecule·m <sup>-3</sup> )     |                                                           | $3.773 \times 10^{20}$                     |
| Velocity of molecule: $v_{\text{SO}_2}$                                 | Gas constant: $R$ (J·mol <sup>-1</sup> ·K <sup>-1</sup> ) | 8.314                                      |
|                                                                         | Temperature: $T$ (Kelvin)                                 | 298                                        |
|                                                                         | Molar mass: $M_{\text{SO}_2}$ (kg·mol <sup>-1</sup> )     | 64.06                                      |
|                                                                         | Pi: $\pi$ (dimensionless)                                 | 3.1416                                     |

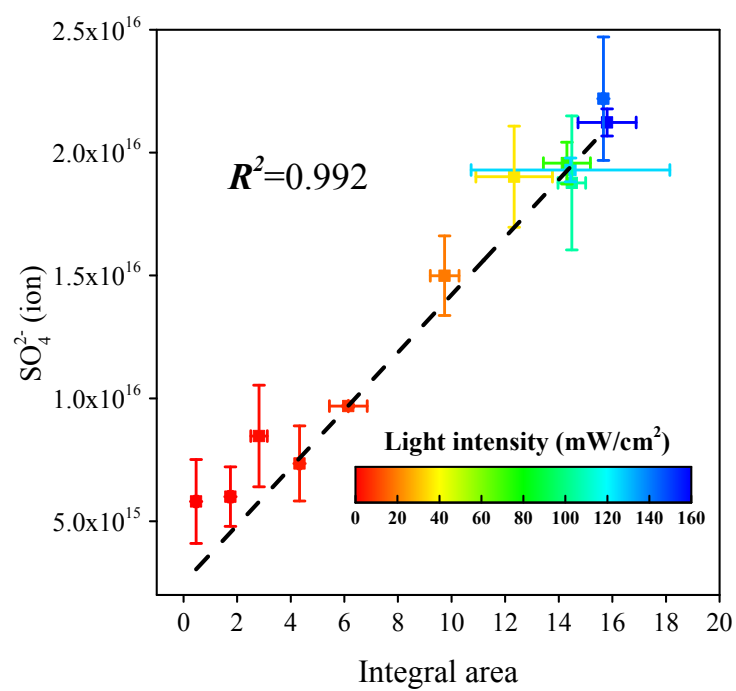

**Figure S5.** Calibration plot with amount of  $\text{SO}_4^{2-}$  versus corresponding integrated areas for sulfate species.

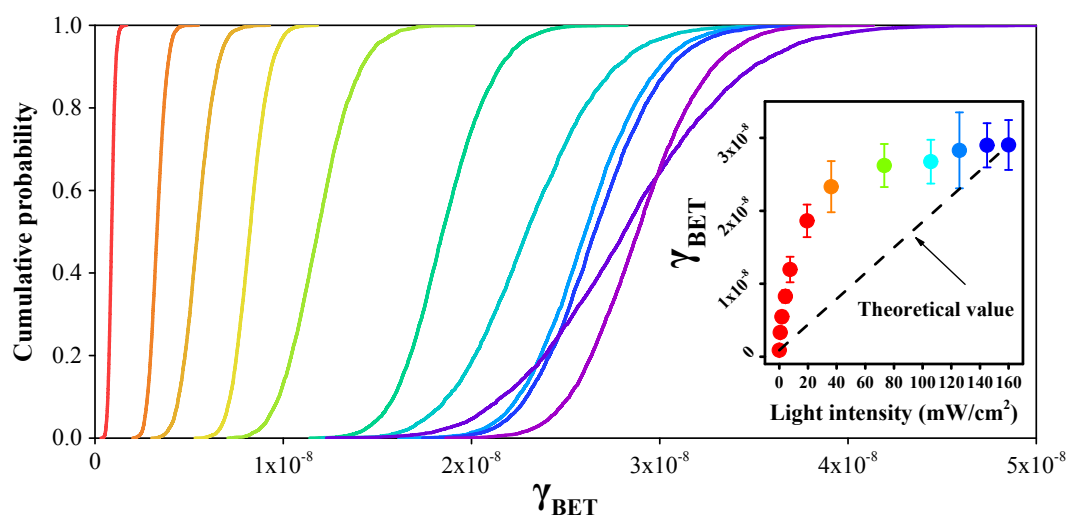

**Figure S6.** Cumulative probability of the  $\gamma_{\text{BET}}$  values based on Monte Carlo simulation. Inset: actual  $\gamma$ -values (Mean  $\pm 1\sigma$ ) and theoretical ones.

**Table S2.** Reactive uptake coefficients ( $\gamma_{\text{BET}}$  and  $\gamma_{\text{geo}}$ ) for the heterogeneous uptake of  $\text{SO}_2$  on particles under various light intensities.

| Light intensity<br>( $\text{mW}\cdot\text{cm}^{-2}$ ) | $\gamma_{\text{BET}}$ |                       |                       |                       |                      |                                              | $\gamma_{\text{geo}}$ |                      |                      |                      |                      |                                            |
|-------------------------------------------------------|-----------------------|-----------------------|-----------------------|-----------------------|----------------------|----------------------------------------------|-----------------------|----------------------|----------------------|----------------------|----------------------|--------------------------------------------|
|                                                       | 10th                  | 25th                  | 50th                  | 75th                  | 90th                 | Mean $\pm$ SD                                | 10th                  | 25th                 | 50th                 | 75th                 | 90th                 | Mean $\pm$ SD                              |
| 0.0                                                   | $6.83\times 10^{-10}$ | $7.73\times 10^{-10}$ | $8.85\times 10^{-10}$ | $9.93\times 10^{-10}$ | $1.10\times 10^{-9}$ | $8.90\times 10^{-10}\pm 1.68\times 10^{-10}$ | $3.83\times 10^{-6}$  | $4.34\times 10^{-6}$ | $4.92\times 10^{-6}$ | $5.48\times 10^{-6}$ | $6.07\times 10^{-6}$ | $4.94\times 10^{-6}\pm 8.74\times 10^{-7}$ |
| 0.71                                                  | $2.78\times 10^{-9}$  | $3.02\times 10^{-9}$  | $3.29\times 10^{-9}$  | $3.59\times 10^{-9}$  | $3.86\times 10^{-9}$ | $3.32\times 10^{-9}\pm 4.18\times 10^{-10}$  | $1.58\times 10^{-5}$  | $1.70\times 10^{-5}$ | $1.83\times 10^{-5}$ | $1.97\times 10^{-5}$ | $2.10\times 10^{-5}$ | $1.84\times 10^{-5}\pm 2.03\times 10^{-6}$ |
| 1.86                                                  | $4.44\times 10^{-9}$  | $4.91\times 10^{-9}$  | $5.44\times 10^{-9}$  | $6.00\times 10^{-9}$  | $6.53\times 10^{-9}$ | $5.48\times 10^{-9}\pm 8.16\times 10^{-10}$  | $2.51\times 10^{-5}$  | $2.75\times 10^{-5}$ | $3.02\times 10^{-5}$ | $3.31\times 10^{-5}$ | $3.57\times 10^{-5}$ | $3.05\times 10^{-5}\pm 4.14\times 10^{-6}$ |
| 4.30                                                  | $7.18\times 10^{-9}$  | $7.65\times 10^{-9}$  | $8.23\times 10^{-9}$  | $8.81\times 10^{-9}$  | $9.37\times 10^{-9}$ | $8.27\times 10^{-9}\pm 8.65\times 10^{-10}$  | $4.08\times 10^{-5}$  | $4.31\times 10^{-5}$ | $4.58\times 10^{-5}$ | $4.84\times 10^{-5}$ | $5.08\times 10^{-5}$ | $4.59\times 10^{-5}\pm 3.94\times 10^{-6}$ |
| 7.50                                                  | $9.78\times 10^{-9}$  | $1.07\times 10^{-8}$  | $1.18\times 10^{-8}$  | $1.30\times 10^{-8}$  | $1.42\times 10^{-8}$ | $1.20\times 10^{-8}\pm 1.75\times 10^{-9}$   | $5.51\times 10^{-5}$  | $6.01\times 10^{-5}$ | $6.58\times 10^{-5}$ | $7.18\times 10^{-5}$ | $7.74\times 10^{-5}$ | $6.62\times 10^{-5}\pm 8.73\times 10^{-6}$ |
| 19.4                                                  | $1.59\times 10^{-8}$  | $1.71\times 10^{-8}$  | $1.85\times 10^{-8}$  | $2.00\times 10^{-8}$  | $2.15\times 10^{-8}$ | $1.86\times 10^{-8}\pm 2.23\times 10^{-9}$   | $8.98\times 10^{-5}$  | $9.60\times 10^{-5}$ | $1.03\times 10^{-4}$ | $1.10\times 10^{-4}$ | $1.17\times 10^{-4}$ | $1.03\times 10^{-4}\pm 1.08\times 10^{-5}$ |
| 36.2                                                  | $1.88\times 10^{-8}$  | $2.07\times 10^{-8}$  | $2.30\times 10^{-8}$  | $2.54\times 10^{-8}$  | $2.77\times 10^{-8}$ | $2.33\times 10^{-8}\pm 3.51\times 10^{-9}$   | $1.06\times 10^{-4}$  | $1.17\times 10^{-4}$ | $1.28\times 10^{-4}$ | $1.40\times 10^{-4}$ | $1.52\times 10^{-4}$ | $1.29\times 10^{-4}\pm 1.78\times 10^{-5}$ |
| 73.3                                                  | $2.25\times 10^{-8}$  | $2.41\times 10^{-8}$  | $2.61\times 10^{-8}$  | $2.81\times 10^{-8}$  | $3.00\times 10^{-8}$ | $2.62\times 10^{-8}\pm 2.95\times 10^{-9}$   | $1.27\times 10^{-4}$  | $1.36\times 10^{-4}$ | $1.50\times 10^{-4}$ | $1.54\times 10^{-4}$ | $1.63\times 10^{-4}$ | $1.45\times 10^{-4}\pm 1.39\times 10^{-5}$ |
| 105.7                                                 | $2.29\times 10^{-8}$  | $2.47\times 10^{-8}$  | $2.66\times 10^{-8}$  | $2.87\times 10^{-8}$  | $3.06\times 10^{-8}$ | $2.67\times 10^{-8}\pm 3.00\times 10^{-9}$   | $1.30\times 10^{-4}$  | $1.38\times 10^{-4}$ | $1.48\times 10^{-4}$ | $1.57\times 10^{-4}$ | $1.66\times 10^{-4}$ | $1.49\times 10^{-4}\pm 1.42\times 10^{-5}$ |
| 125.7                                                 | $2.16\times 10^{-8}$  | $2.47\times 10^{-8}$  | $2.81\times 10^{-8}$  | $3.16\times 10^{-8}$  | $3.50\times 10^{-8}$ | $2.83\times 10^{-8}\pm 5.21\times 10^{-9}$   | $1.22\times 10^{-4}$  | $1.38\times 10^{-4}$ | $1.57\times 10^{-4}$ | $1.75\times 10^{-4}$ | $1.92\times 10^{-4}$ | $1.58\times 10^{-4}\pm 2.74\times 10^{-5}$ |
| 145                                                   | $2.52\times 10^{-8}$  | $2.68\times 10^{-8}$  | $2.89\times 10^{-8}$  | $3.09\times 10^{-8}$  | $3.29\times 10^{-8}$ | $2.90\times 10^{-8}\pm 3.03\times 10^{-9}$   | $1.43\times 10^{-4}$  | $1.51\times 10^{-4}$ | $1.61\times 10^{-4}$ | $1.70\times 10^{-4}$ | $1.78\times 10^{-4}$ | $1.61\times 10^{-4}\pm 1.38\times 10^{-5}$ |
| 160                                                   | $2.48\times 10^{-8}$  | $2.66\times 10^{-8}$  | $2.88\times 10^{-8}$  | $3.12\times 10^{-8}$  | $3.35\times 10^{-8}$ | $2.90\times 10^{-8}\pm 3.42\times 10^{-9}$   | $1.40\times 10^{-4}$  | $1.50\times 10^{-4}$ | $1.60\times 10^{-4}$ | $1.72\times 10^{-4}$ | $1.82\times 10^{-4}$ | $1.61\times 10^{-4}\pm 1.65\times 10^{-5}$ |

### Section S3. XPS evidence

S (IV) and S(VI) species can be distinguished according to the analysis on the XPS spectra for pure  $\text{ZnSO}_4$  and  $\text{ZnSO}_3$  (**Figure S7**). The S(IV) species were observed at 166.8 and 167.9 eV for the  $\text{S}2\text{p}_{3/2}$  and  $\text{S}2\text{p}_{1/2}$  transitions, respectively. Correspondingly, the S(VI) ones characterized by  $\text{S}2\text{p}_{3/2}$  and  $\text{S}2\text{p}_{1/2}$  transitions could be identified at 169.0 and 170.0 eV, respectively.

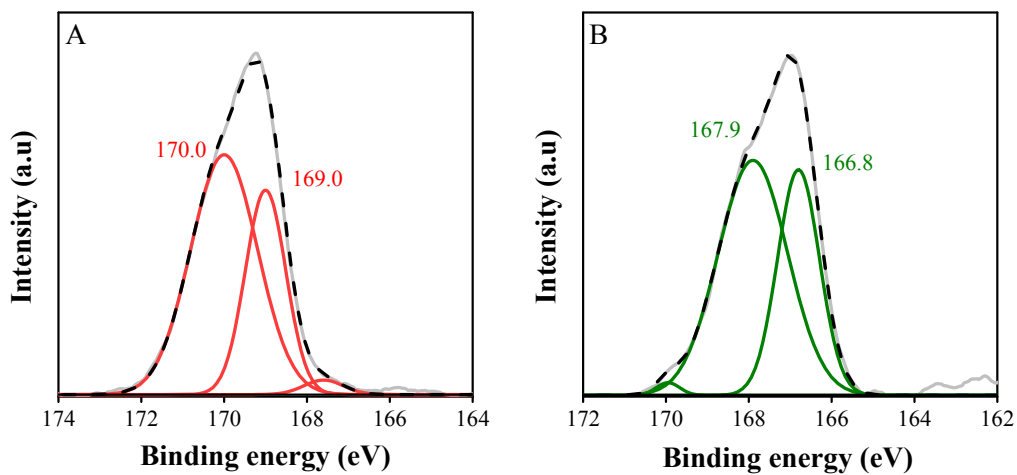

**Figure S7.** High resolution XPS data in the S2p regions for (A)  $\text{ZnSO}_4$  and (B)  $\text{ZnSO}_3$ .

## Section S4. Detailed reactions in the photocatalytic process

Reactions for the heterogeneous reaction of SO<sub>2</sub> on mineral dust particles are listed below according to some previous studies.

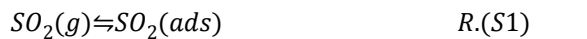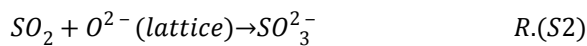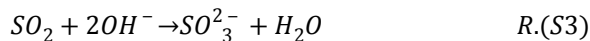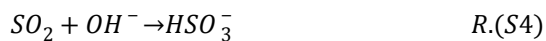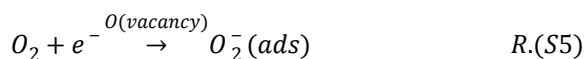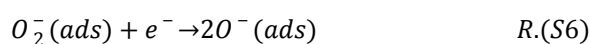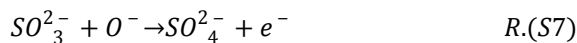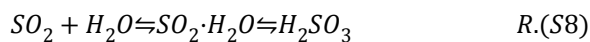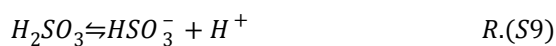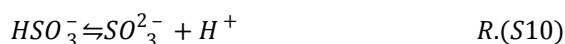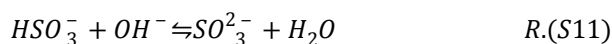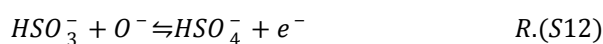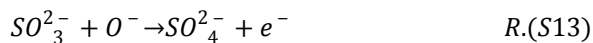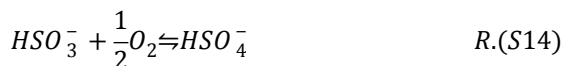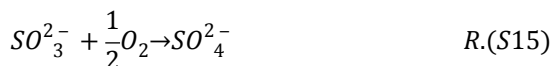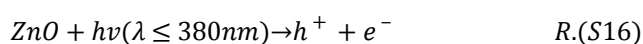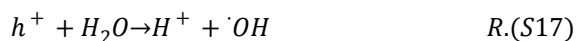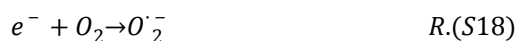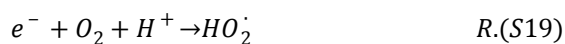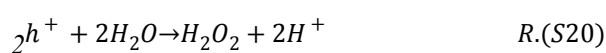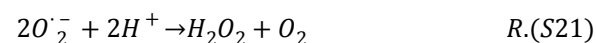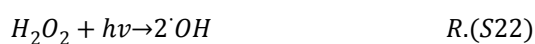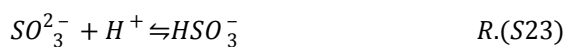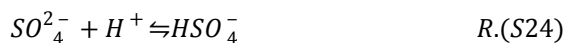

Supplement: c9en01148j1.pdf [file c9en01148j1.pdf]
